# Supplementary material
Source: PubMed Central journal article supplement (PMC5808643)
Supplement: dex047suppl_figure1.pdf [file dex047suppl_figure1.pdf]

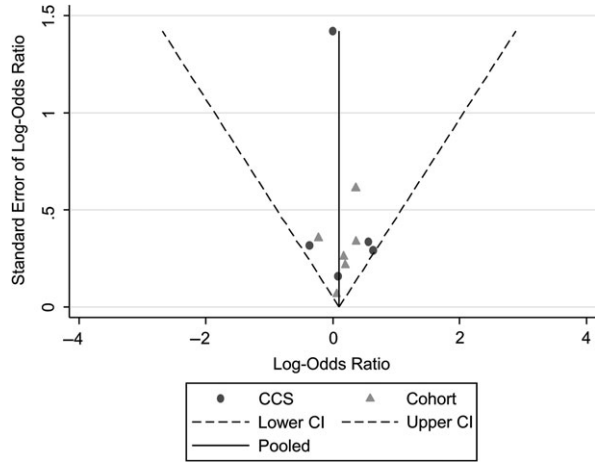

**Supplementary Figure S1** Funnel plot, with study variance (i.e. SE of the log-odds ratio, vertical axis) plotted against measure of association (i.e. log-odds ratio, horizontal axis).
