# Supplementary material
Source: PubMed Central journal article supplement (PMC5808643)
Supplement: dex047suppl_table2.pdf [file dex047suppl_table2.pdf]

---

**Supplementary Table SII Boolean syntax used to conduct literature search in Scopus, Ovid Medline, EMBASE and Web of Science databases.**

*Scopus*: TITLE-ABS-KEY (analges\* OR paracetamol OR acetaminophen) AND TITLE-ABS-KEY (cryptorchidism OR cryptorchism OR 'undescended test\*' OR 'non-descended test\*' OR 'non descended test\*').

*Ovid Medline and EMBASE*: (analges\* or paracetamol or acetaminophen).af. AND (cryptorchidism or cryptorchism or undescended test\* or non-descended test\* or non descended test\*).af.

*Web of Science*: TS = (analges\* or paracetamol or acetaminophen) AND TS = (cryptorchidism or cryptorchism or undescended test\* or non-descended test\* or non descended test\*).
