# Supplementary material
Source: PubMed Central journal article supplement (PMC5808643)
Supplement: dex047suppl_table3.pdf [file dex047suppl_table3.pdf]

**Supplementary Table SIII List of excluded papers and reason for exclusion.**

| Author                  | Year | Title                                                                                                                                          | Reason for exclusion                                                                                                       |
|-------------------------|------|------------------------------------------------------------------------------------------------------------------------------------------------|----------------------------------------------------------------------------------------------------------------------------|
| Anonymous               | 2011 | Mild analgesics pose risk for male reproductive disorders                                                                                      | Report of findings presented elsewhere ( <a href="#">Kristensen et al., 2011</a> )                                         |
| Anonymous               | 2012 | Paracetamol during pregnancy: No particular danger for the child                                                                               | Review manuscript (no primary data)                                                                                        |
| Barthold et al.         | 2012 | Altered infant feeding patterns in boys with acquired nonsyndromic cryptorchidism                                                              | No assessment of paracetamol exposure                                                                                      |
| Bay et al.              | 2011 | Testicular descent: INSL3, testosterone, genes and the intrauterine milieu                                                                     | Review manuscript (no primary data)                                                                                        |
| Burdan et al.           | 2012 | Developmental toxicity of the over-the-counter analgesics and antipyretics [Polish]                                                            | Review manuscript (no primary data)                                                                                        |
| Burdan et al.           | 2012 | Prenatal tolerability of acetaminophen and other over-the-counter non-selective cyclooxygenase inhibitors                                      | Review manuscript (no primary data)                                                                                        |
| Dear et al.             | 2015 | Where are we now with paracetamol?                                                                                                             | Editorial (no primary data)                                                                                                |
| El-Attabi N.            | 2011 | Analgesic use and its effect on male reproduction                                                                                              | Commentary letter seeking clarification regarding ( <a href="#">Kristensen et al., 2011</a> ) manuscript (no primary data) |
| Jegou B.                | 2014 | The headache of analgesics during pregnancy and the foetal reproductive system: How and why                                                    | No assessment of cryptorchidism outcome; aborted foetuses used for measurements (rather than live-born boys)               |
| Jegou, B                | 2015 | Paracetamol-induced endocrine disruption in human foetal testes                                                                                | News/review manuscript                                                                                                     |
| Jensen et al.           | 2010 | Maternal use of acetaminophen, ibuprofen and acetylsalicylic acid during pregnancy and cryptorchidism: A population-based cohort study         | Results reported elsewhere ( <a href="#">Jensen et al., 2010</a> ); poster presentation                                    |
| Jensen et al.           | 2011 | Analgesics during pregnancy and cryptorchidism: additional analyses                                                                            | Additional analyses of results reported elsewhere ( <a href="#">Jensen et al., 2010</a> )                                  |
| Kallen and Reis         | 2015 | Use of tramadol in early pregnancy and congenital malformation risk                                                                            | No assessment of cryptorchidism outcome                                                                                    |
| Kristensen et al.       | 2012 | Paracetamol (acetaminophen), aspirin (acetylsalicylic acid) and indomethacin are anti-androgenic in the rat foetal testis                      | No assessment of outcome in humans (only animal models)                                                                    |
| Mavrogenis et al.       | 2014 | Possible association of maternal factors with the higher risk of isolated true undescended testis: A population-based case-control study       | No assessment of analgesia exposure (primarily fertility medications)                                                      |
| Mazaud-Guittot, et al.  | 2013 | Paracetamol, aspirin, and indomethacin induce endocrine disturbances in the human foetal testis capable of interfering with testicular descent | Aborted foetuses used for measurements (rather than live-born boys)                                                        |
| Kristensen et al.       | 2011 | Reply: Analgesic use and its effect on male reproduction                                                                                       | No primary data provided                                                                                                   |
| Modick et al.           | 2014 | Ubiquitous presence of paracetamol in human urine: sources and implications                                                                    | No assessment of cryptorchidism outcome                                                                                    |
| Omar, E.-T.             | 2013 | The pathophysiological mechanism and manifestations of cryptorchidism and its link to antepartum analgesic use                                 | Review (no primary data)                                                                                                   |
| Reis and Kallen         | 2008 | Maternal use of antipsychotics in early pregnancy and delivery outcome                                                                         | No assessment of analgesia exposure                                                                                        |
| Thiele et al.           | 2013 | Acetaminophen and pregnancy: Short- and long-term consequences for mother and child                                                            | Review manuscript (no primary data)                                                                                        |
| van den Driesche et al. | 2015 | Prolonged exposure to acetaminophen reduces testosterone production by the human foetal testis in a xenograft model                            | Aborted foetuses used for measurements (rather than live-born boys); cryptorchidism not investigated as an primary outcome |
| Werler et al.           | 2005 | Use of over-the-counter medications during pregnancy                                                                                           | No assessment of cryptorchidism outcome                                                                                    |
