# Supplementary material
Source: PubMed Central journal article supplement (PMC5808643)
Supplement: dex047suppl_table5.pdf [file dex047suppl_table5.pdf]

**Supplementary Table SV Assessment of study quality against Newcastle-Ottawa criteria for cohort studies; explanation of categorization is presented in supplementary material alongside its corresponding number.**

| Author                   | Year | Representativeness of exposed cohort <sup>a</sup>                         | Selection of non-exposed cohort                     | Ascertainment of exposure                    | Demonstrated outcome was not present at start of study | Comparability of exposed and non-exposed                              | Assessment of outcome  | Sufficient follow-up length <sup>b</sup> | Loss to follow-up                                           |
|--------------------------|------|---------------------------------------------------------------------------|-----------------------------------------------------|----------------------------------------------|--------------------------------------------------------|-----------------------------------------------------------------------|------------------------|------------------------------------------|-------------------------------------------------------------|
| Jensen <i>et al.</i>     | 2010 | Somewhat representative of mothers and boys in the community              | Drawn from the same community as the exposed cohort | Written self-report and structured interview | Yes                                                    | Cohorts comparable (study controls for child's age and other factors) | Record linkage         | Yes                                      | 2% lost to follow-up, unlikely to cause bias                |
| Kristensen <i>et al.</i> | 2011 | Somewhat representative of mothers and boys in the community              | Drawn from the same community as the exposed cohort | Written self-report or structured interview  | Yes                                                    | Cohorts comparable (study controls for child's age and other factors) | Independent assessment | Yes                                      | No statement <sup>c</sup>                                   |
| Philippat <i>et al.</i>  | 2011 | Somewhat representative of mothers and boys in the community              | Drawn from the same community as the exposed cohort | Structured interview                         | Yes                                                    | Cohorts comparable (study controls for child's age and other factors) | Independent assessment | Yes                                      | No statement                                                |
| Rebordosa <i>et al.</i>  | 2008 | Somewhat representative of mothers and boys in the community <sup>d</sup> | Drawn from the same community as the exposed cohort | Structured interview and Written self-report | Yes                                                    | Cohorts comparable (study controls for child's age and other factors) | Record linkage         | Yes                                      | 1.48% lost to follow-up, unlikely to cause bias             |
| Snijder <i>et al.</i>    | 2012 | Somewhat representative of mothers and boys in the community              | Drawn from the same community as the exposed cohort | Written self-report                          | Yes <sup>d</sup>                                       | Cohorts comparable (study controls for child's age and other factors) | Independent assessment | Yes                                      | 6.9% lost to follow-up, unlikely to cause bias <sup>e</sup> |

<sup>a</sup>This item is poorly defined by the authors of the Newcastle-Ottawa scale. For clarification, for the purposes of this review we have defined this criterion as whether the members of the cohort who were exposed to analgesia during pregnancy might (or might not) be considered representative of members of the general population who were exposed to analgesia during pregnancy. All study cohorts were deemed to be 'somewhat representative', although this is a relatively vague classification with little actual application. Overall, we did not consider that any of the included studies introduced meaningful bias by inadequately addressing this criterion.

<sup>b</sup>For the purposes of this review, follow-up time was deemed sufficient provided that cryptorchidism was defined at or sometime after birth (i.e. an inevitable characteristic of any congenital anomaly study).

<sup>c</sup>No information was provided regarding loss to follow-up between the point at which the questionnaire was administered (during the third trimester) and outcome measurement (the latter differing between participants within the study). The method of outcome measurement (but not loss to follow-up) for this cohort study is further described in by the authors in the earlier manuscript by [Boisen et al. \(2011\)](#): 'The boys were examined shortly after birth and at 3 months of age. In Denmark, all boys were re-examined at 18 months of age. In Finland, however, only boys with congenital cryptorchidism and selected controls were seen at 18 months. In case of preterm birth, examination took place at birth (Finland) or around the expected date of delivery (Finland and Denmark), or both (Finland), and again 3 and 18 months later.'

<sup>d</sup>While 898 mothers were enrolled into this cohort study (the 'Generation R' study) at the birth of their child, none of these participants were included in the final analysis (since data were not collected during pregnancy for these mothers).

<sup>e</sup>The authors state that a total of 3982 boys were available for follow-up, of which 3708 boys visited a clinic for follow-up at least once (93.1%) and were thus included in the final cohort.
